# Supplementary material for: Sampling strategies for frequency spectrum-based population genomic inference
Source: PubMed Central journal article supplement (PMC4269862; doi:10.1186/s12862-014-0254-4), 2014-12-04
Supplement: 12862_2014_254_MOESM1_ESM.pdf [file 12862_2014_254_MOESM1_ESM.pdf]

## Additional file 1

**Figure S1.** Comparison of  $s$  estimates for the isolation (ISO) model with recent divergence using different starting points and parameter perturbation settings. Sample sizes are given above each plot (e.g., 2x2 indicates samples of two chromosomes, or one diploid individual, per population). For each sample size,  $s$  estimates obtained using a starting point of 0.5 and a perturbation fold of 2 ( $s_{0.5}$ ) are plotted versus the same dataset analyzed with a starting point of 0.25 and a perturbation fold of 1 ( $s_{0.25}$ ). The smaller starting point led to a downward bias for smaller sample sizes, as evidenced by the clustering of points to the left of figures with sample sizes smaller than 20 diploid individuals per population.

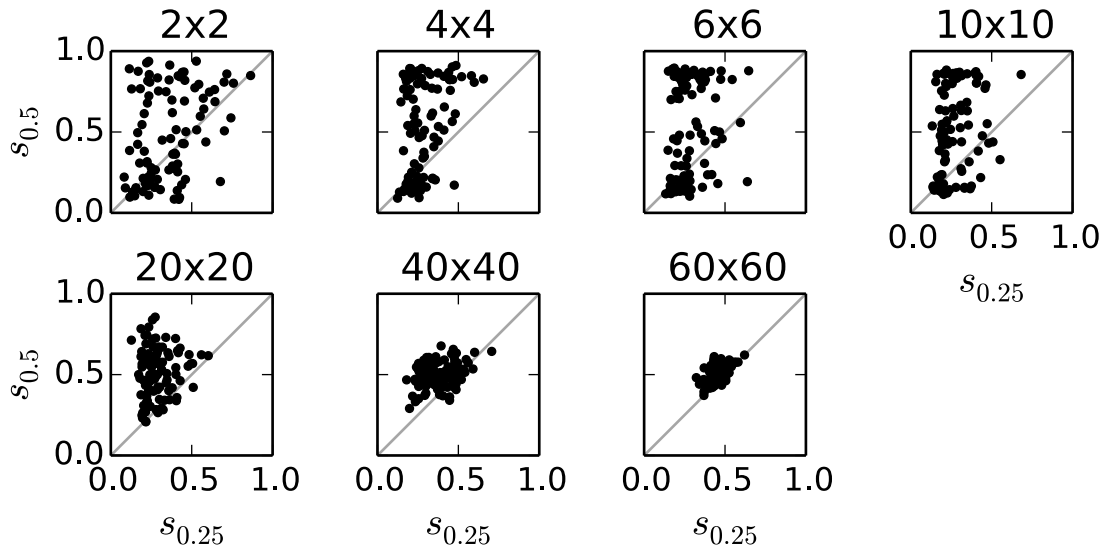

**Figure S2.** Comparison between allele frequency spectra simulated in  $\delta\text{adi}$  (Gutenkunst et al. 2009) and in the coalescent simulator  $\text{ms}$  (Hudson 2002) for a model of ancient ( $T = 1.5$ ) population growth (POSG; Table S3) with  $n = 30$  diploid individuals sampled. The top panel shows the frequency spectrum obtained under each approach ( $\text{ms}$  – blue,  $\delta\text{adi}$  – red), while the bottom shows Anscombe Poisson residuals for each cell of the AFS. The  $\text{ms}$  spectrum was generated by running  $10^8$   $\text{ms}$  simulations with  $\theta=1$ , taking the mean of each entry across those simulations, and multiplying each entry by 4500 to match  $\theta$  for the corresponding  $\delta\text{adi}$  simulation using the parameters in Table S3. A similar procedure was followed to generate Figures S3 and S4.

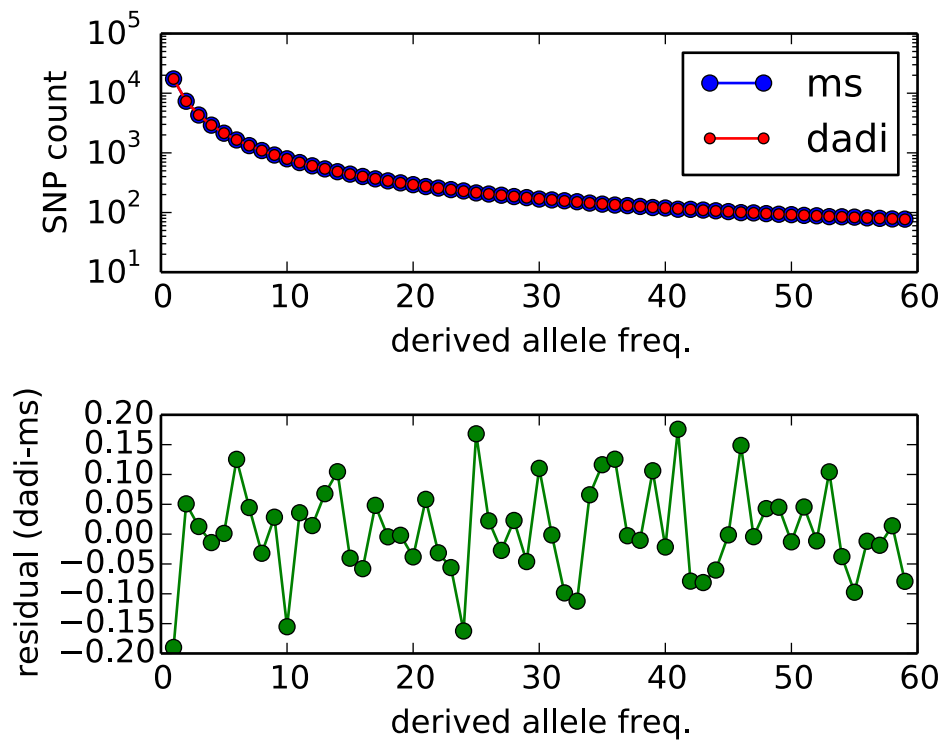

**Figure S3.** Comparison between allele frequency spectra simulated in  $\delta\text{adi}$  (Gutenkunst et al. 2009) and in the coalescent simulator  $\text{ms}$  (Hudson 2002) for a model of population growth (POSG; Table S4) with  $n = 1351$  diploid individuals sampled. The top panel shows the frequency spectrum obtained under each approach ( $\text{ms}$  – blue,  $\delta\text{adi}$  – red), while the bottom shows Anscombe Poisson residuals for each cell of the AFS.

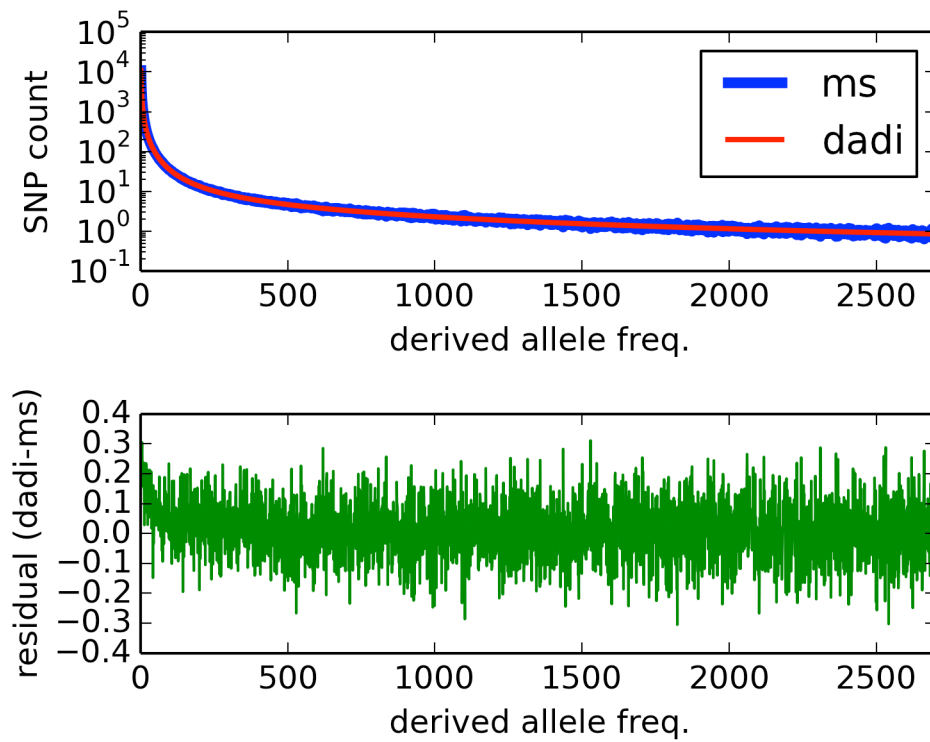

**Figure S4.** Comparison between allele frequency spectra simulated in  $\delta\delta i$  (Gutenkunst et al. 2009) and in the coalescent simulator *ms* (Hudson 2002) for a model of very recent ( $T = 0.005$ ) divergence (ISO; Table S5) with  $n = 30$  diploid individuals sampled. The upper panels show the frequency spectra, while the lower panels show the Anscombe Poisson residuals between *dadi* and *ms*.

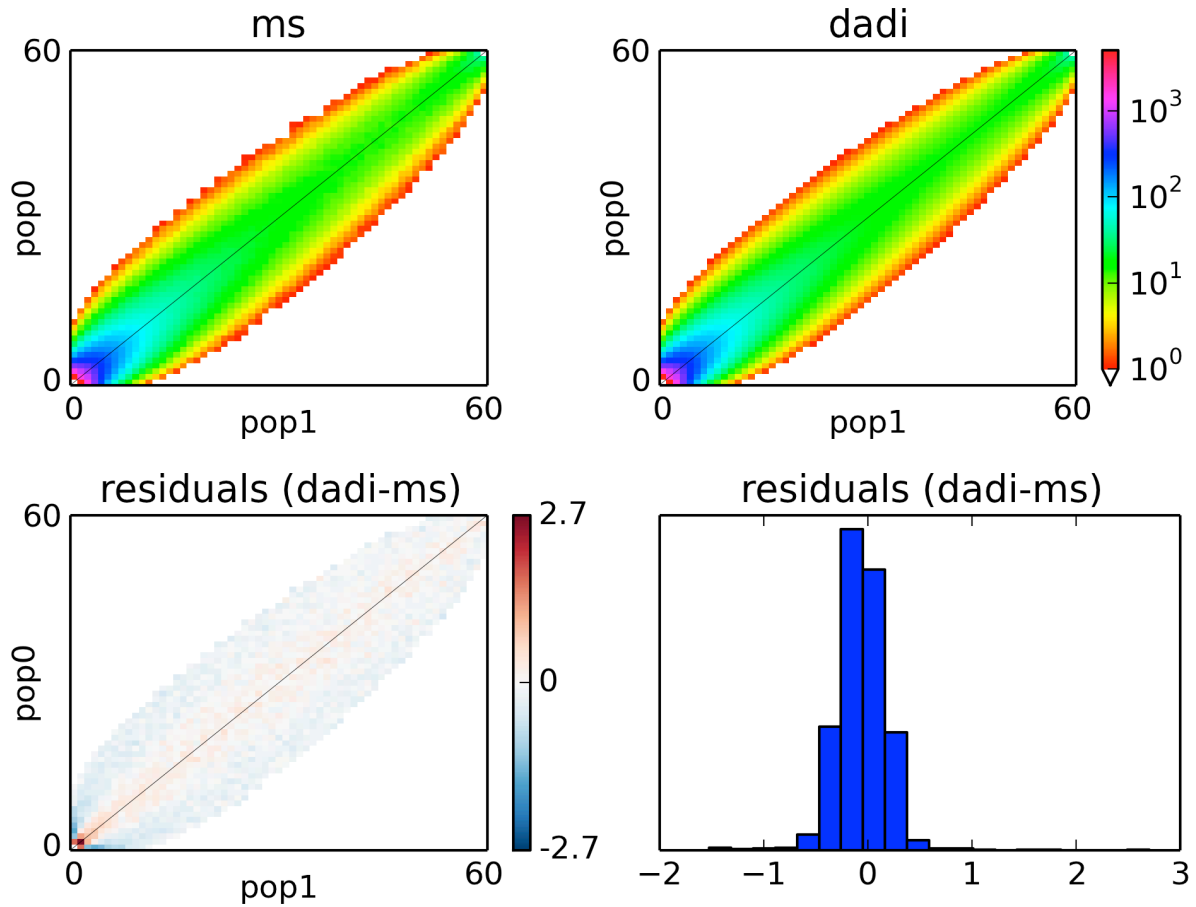

**Figure S5.** Model selection results for single-population datasets ( $n = 86$  datasets) simulated with older demographic events ( $T = 1.5$ ). Model parameters are slightly modified from the A parameterization in Table 1. The distribution of Akaike weights in favor of each model is shown for data simulated under the four single-population demographic models. All datasets consisted of  $n = 30$  diploid individuals.

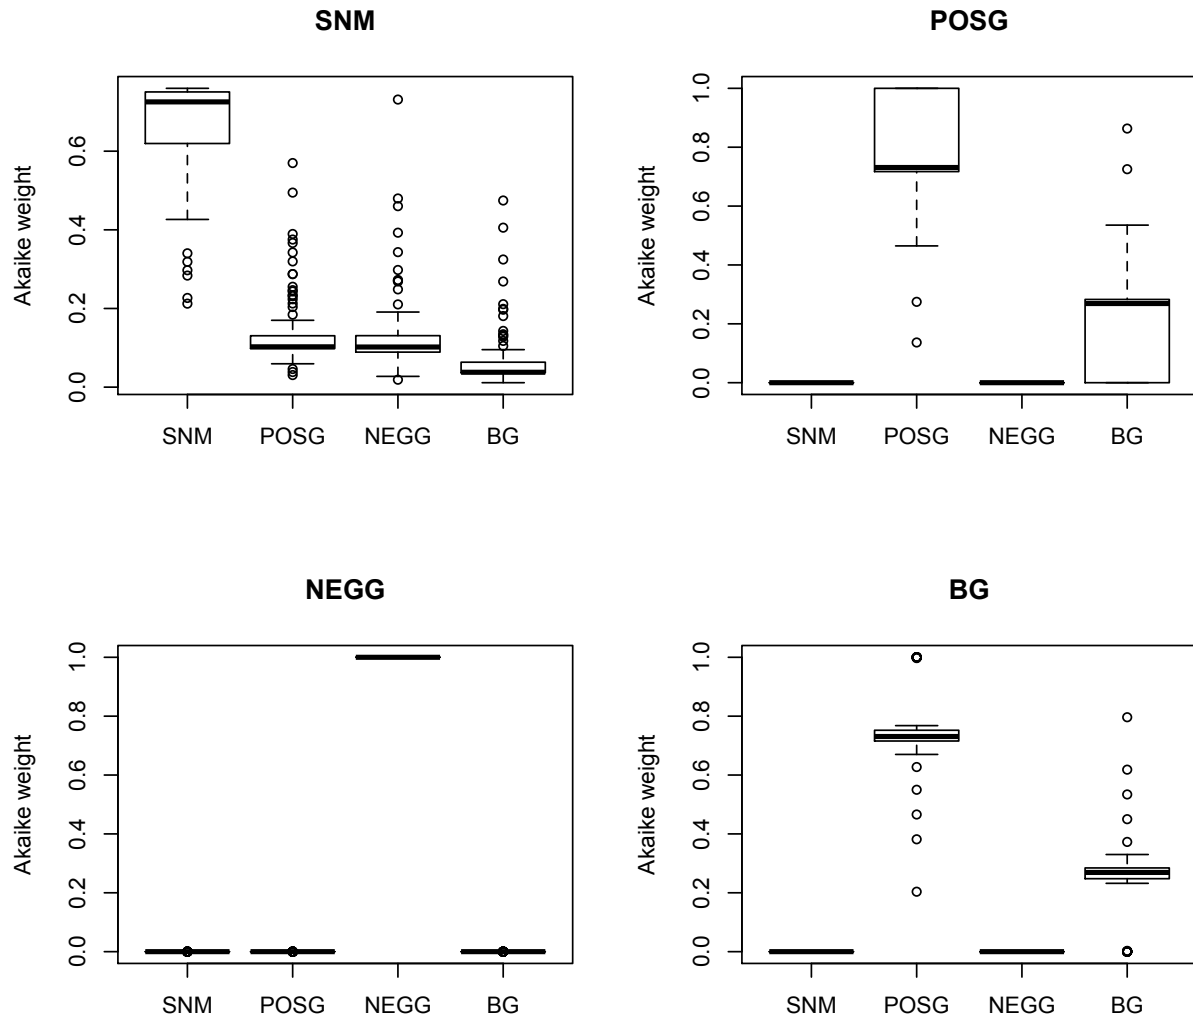

**Figure S6.** Model selection results for single-population datasets ( $n = 100$  datasets) with large sample sizes ( $n = 1351$  diploid individuals). Model parameters are slightly modified from the A parameterization in Table 1. The distribution of Akaike weights in favor of each model is shown for data simulated under the four single-population demographic models.

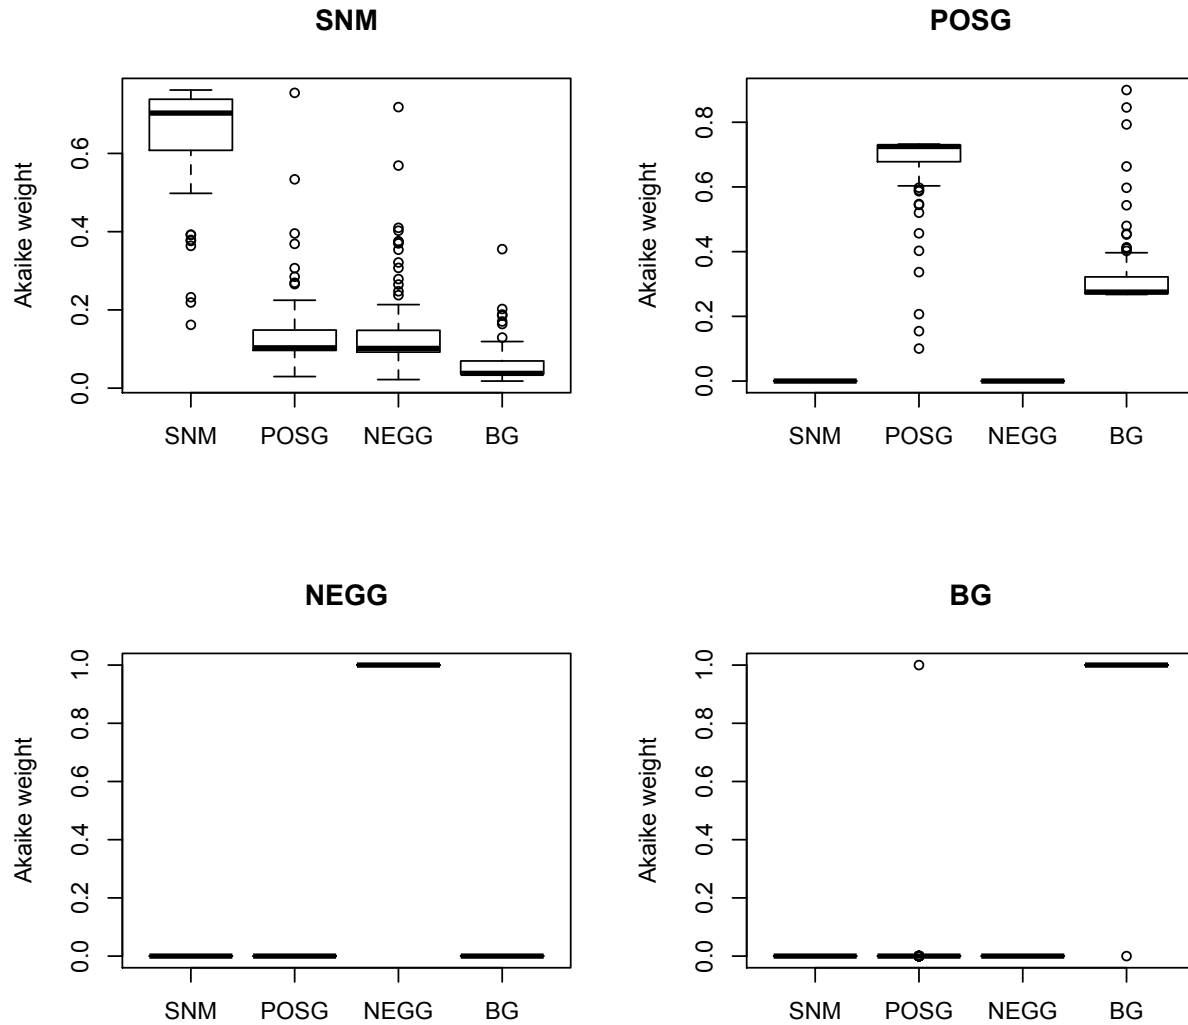

**Figure S7.** Model selection results for two-population datasets ( $n = 100$  datasets) with very recent divergence ( $T = 0.005$ ) and sample sizes of  $n = 30$  diploid individuals per population. Model parameters are slightly modified from the A parameterization in Table 2. The distribution of Akaike weights in favor of each model is shown for data simulated under the four single-population demographic models.

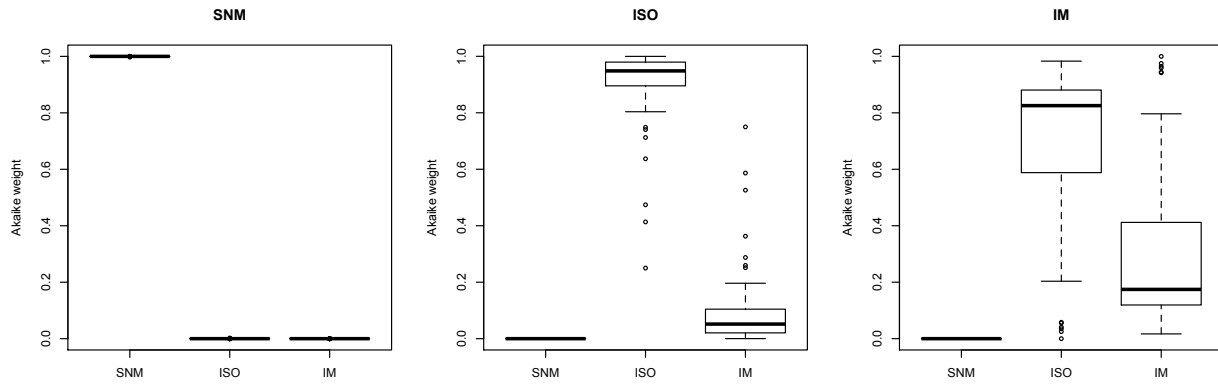

**Table S1.** Statistics associated with single-population datasets. Median estimates, median uncertainties, RMSE, and the proportional coverage of 95% confidence intervals for all model parameters, models, and sample sizes are given.

| Model | Parameter | Simulated Value | $n$   | Median Estimate | Median Uncertainty | RMSE   | Coverage of 95% CI | Simulated Value | $n$ | Median Estimate | Median Uncertainty | RMSE   | Coverage of 95% CI |
|-------|-----------|-----------------|-------|-----------------|--------------------|--------|--------------------|-----------------|-----|-----------------|--------------------|--------|--------------------|
| SNM   | $\theta$  | 10000           | 2     | 10002.49        | 74.33              | 69.64  | 0.94               | NA              | --  | --              | --                 | --     |                    |
|       |           |                 | 3     | 9997.60         | 66.54              | 66.62  | 0.93               |                 | --  | --              | --                 | --     |                    |
|       |           |                 | 5     | 10007.04        | 59.73              | 56.30  | 0.96               |                 | --  | --              | --                 | --     |                    |
|       |           |                 | 10    | 9995.64         | 53.20              | 47.56  | 0.98               |                 | --  | --              | --                 | --     |                    |
|       |           |                 | 20    | 10001.68        | 48.53              | 46.10  | 0.95               |                 | --  | --              | --                 | --     |                    |
|       |           |                 | 30    | 10003.61        | 46.34              | 39.49  | 0.97               |                 | --  | --              | --                 | --     |                    |
|       |           |                 | 50    | 10003.10        | 43.96              | 44.34  | 0.94               |                 | --  | --              | --                 | --     |                    |
| POSG  | $\theta$  | 6000            | 2     | 5993.26         | 146.61             | 215.66 | 1.00               | 6000            | 2   | 5923.41         | 164.99             | 427.81 | 0.98               |
|       |           |                 | 3     | 5986.41         | 99.60              | 99.59  | 0.94               |                 | 3   | 5945.61         | 88.15              | 279.28 | 0.96               |
|       |           |                 | 5     | 6014.06         | 77.54              | 80.15  | 0.95               |                 | 5   | 5984.77         | 69.86              | 216.83 | 0.97               |
|       |           |                 | 10    | 6003.92         | 65.10              | 73.06  | 0.92               |                 | 10  | 5986.54         | 55.73              | 60.26  | 0.97               |
|       |           |                 | 20    | 6005.90         | 58.75              | 61.95  | 0.93               |                 | 20  | 6002.47         | 49.71              | 53.41  | 0.92               |
|       |           |                 | 30    | 5996.26         | 56.87              | 59.62  | 0.93               |                 | 30  | 6004.14         | 46.72              | 49.88  | 0.94               |
|       |           |                 | 50    | 6009.10         | 55.01              | 51.39  | 0.96               |                 | 50  | 5993.61         | 44.21              | 48.31  | 0.95               |
|       | $\eta_c$  | 5               | 2.5   | 2               | 4.95               | 4.53   | 36.07              | 0.77            | 2   | 1.25            | 1.18               | 20.68  | 0.69               |
|       |           |                 |       | 3               | 5.01               | 2.89   | 19.05              | 0.81            | 3   | 1.24            | 0.90               | 28.58  | 0.54               |
|       |           |                 |       | 5               | 5.22               | 1.30   | 1.59               | 0.95            | 5   | 1.38            | 0.85               | 17.58  | 0.58               |
|       |           |                 |       | 10              | 4.98               | 0.41   | 0.43               | 0.95            | 10  | 2.04            | 1.56               | 12.40  | 0.75               |
|       |           |                 |       | 20              | 5.00               | 0.20   | 0.20               | 0.95            | 20  | 2.25            | 0.87               | 4.02   | 0.88               |
|       |           |                 |       | 30              | 4.99               | 0.14   | 0.13               | 0.96            | 30  | 2.54            | 0.72               | 2.72   | 0.89               |
|       |           |                 |       | 50              | 5.00               | 0.10   | 0.10               | 0.95            | 50  | 2.49            | 0.37               | 2.45   | 0.92               |
|       | $T$       | 0.25            | 0.025 | 2               | 0.260              | 0.212  | 0.311              | 0.82            | 2   | 0.374           | 0.865              | 2.178  | 1.00               |
|       |           |                 |       | 3               | 0.257              | 0.089  | 0.090              | 0.93            | 3   | 0.122           | 0.471              | 1.964  | 0.98               |
|       |           |                 |       | 5               | 0.239              | 0.041  | 0.038              | 0.95            | 5   | 0.070           | 0.163              | 1.148  | 1.00               |
|       |           |                 |       | 10              | 0.254              | 0.021  | 0.022              | 0.96            | 10  | 0.036           | 0.050              | 0.236  | 0.88               |
|       |           |                 |       | 20              | 0.251              | 0.013  | 0.014              | 0.93            | 20  | 0.028           | 0.017              | 0.221  | 0.89               |
|       |           |                 |       | 30              | 0.251              | 0.011  | 0.011              | 0.94            | 30  | 0.025           | 0.010              | 0.223  | 0.95               |
|       |           |                 |       | 50              | 0.251              | 0.009  | 0.009              | 0.98            | 50  | 0.025           | 0.006              | 0.224  | 0.96               |



|             |          |              |    |          |         |         |      |              |    |          |        |        |      |
|-------------|----------|--------------|----|----------|---------|---------|------|--------------|----|----------|--------|--------|------|
| <b>NEGG</b> | $\theta$ | <b>29000</b> | 2  | 28105.22 | 3416.19 | 6362.93 | 0.87 | <b>29000</b> | 2  | 29121.12 | 349.15 | 411.59 | 0.96 |
|             |          |              | 3  | 29038.60 | 1730.54 | 5903.26 | 0.97 |              | 3  | 29077.00 | 181.63 | 242.64 | 0.94 |
|             |          |              | 5  | 28771.96 | 993.48  | 1194.02 | 0.89 |              | 5  | 29062.56 | 155.21 | 164.73 | 0.97 |
|             |          |              | 10 | 28979.46 | 744.54  | 864.28  | 0.92 |              | 10 | 28989.07 | 133.26 | 140.42 | 0.94 |
|             |          |              | 20 | 28982.91 | 621.95  | 575.11  | 0.95 |              | 20 | 29016.82 | 122.51 | 122.04 | 0.96 |
|             |          |              | 30 | 29014.32 | 590.10  | 637.83  | 0.92 |              | 30 | 29014.46 | 116.74 | 116.48 | 0.97 |
|             |          |              | 50 | 29141.43 | 556.60  | 572.50  | 0.97 |              | 50 | 29034.66 | 112.89 | 122.15 | 0.93 |
|             | $\eta_D$ | <b>0.1</b>   | 2  | 0.092    | 0.020   | 0.021   | 0.91 | <b>0.25</b>  | 2  | 0.53     | 0.27   | 0.45   | 0.72 |
|             |          |              | 3  | 0.101    | 0.008   | 0.008   | 0.93 |              | 3  | 0.26     | 0.21   | 0.31   | 0.80 |
|             |          |              | 5  | 0.099    | 0.005   | 0.004   | 1.00 |              | 5  | 0.23     | 0.15   | 0.23   | 0.80 |
|             |          |              | 10 | 0.100    | 0.003   | 0.003   | 0.96 |              | 10 | 0.24     | 0.08   | 0.16   | 0.82 |
|             |          |              | 20 | 0.100    | 0.002   | 0.002   | 0.98 |              | 20 | 0.25     | 0.03   | 0.15   | 0.94 |
|             |          |              | 30 | 0.100    | 0.002   | 0.002   | 0.98 |              | 30 | 0.25     | 0.02   | 0.15   | 0.97 |
|             |          |              | 50 | 0.100    | 0.002   | 0.002   | 0.96 |              | 50 | 0.25     | 0.01   | 0.15   | 0.92 |
|             | $T$      | <b>0.25</b>  | 2  | 0.218    | 0.097   | 0.093   | 0.87 | <b>0.025</b> | 2  | 0.075    | 0.239  | 0.236  | 0.99 |
|             |          |              | 3  | 0.251    | 0.041   | 0.046   | 0.97 |              | 3  | 0.027    | 0.066  | 0.215  | 0.97 |
|             |          |              | 5  | 0.242    | 0.022   | 0.023   | 0.92 |              | 5  | 0.022    | 0.031  | 0.217  | 0.86 |
|             |          |              | 10 | 0.251    | 0.013   | 0.015   | 0.90 |              | 10 | 0.024    | 0.012  | 0.226  | 0.84 |
|             |          |              | 20 | 0.251    | 0.009   | 0.009   | 0.95 |              | 20 | 0.025    | 0.005  | 0.225  | 0.93 |
|             |          |              | 30 | 0.252    | 0.008   | 0.009   | 0.92 |              | 30 | 0.025    | 0.003  | 0.225  | 0.93 |
|             |          |              | 50 | 0.251    | 0.007   | 0.007   | 0.94 |              | 50 | 0.025    | 0.002  | 0.224  | 0.92 |
| <b>BG</b>   | $\theta$ | <b>10000</b> | 2  | 10280.39 | 1531.14 | 2498.98 | 0.92 | <b>10000</b> | 2  | 10083.41 | 144.01 | 449.93 | 0.93 |
|             |          |              | 3  | 10150.05 | 583.51  | 1320.25 | 0.86 |              | 3  | 10043.09 | 109.27 | 169.62 | 0.94 |
|             |          |              | 5  | 10062.26 | 339.46  | 436.98  | 0.82 |              | 5  | 10031.89 | 96.04  | 97.19  | 0.94 |
|             |          |              | 10 | 9993.25  | 167.91  | 239.15  | 0.84 |              | 10 | 10014.87 | 80.69  | 78.50  | 0.97 |
|             |          |              | 20 | 10007.37 | 114.54  | 227.96  | 0.70 |              | 20 | 10000.51 | 71.32  | 88.81  | 0.95 |
|             |          |              | 30 | 10037.95 | 105.67  | 223.35  | 0.71 |              | 30 | 10008.67 | 70.97  | 122.70 | 0.98 |
|             |          |              | 50 | 9974.56  | 90.36   | 214.03  | 0.67 |              | 50 | 10004.41 | 65.79  | 116.08 | 0.92 |
|             | $\eta_D$ | <b>0.1</b>   | 2  | 0.08     | 0.03    | 0.05    | 0.70 | <b>0.25</b>  | 2  | 0.33     | 0.17   | 0.43   | 0.71 |
|             |          |              | 3  | 0.10     | 0.02    | 0.02    | 0.82 |              | 3  | 0.22     | 0.07   | 0.37   | 0.56 |
|             |          |              | 5  | 0.10     | 0.01    | 0.01    | 0.83 |              | 5  | 0.19     | 0.10   | 0.33   | 0.62 |
|             |          |              | 10 | 0.10     | 0.00    | 0.01    | 0.80 |              | 10 | 0.25     | 0.17   | 0.40   | 0.59 |
|             |          |              | 20 | 0.10     | 0.00    | 0.01    | 0.60 |              | 20 | 0.26     | 0.13   | 0.30   | 0.59 |

|  |                            |          |                       |             |       |       |       |            |       |       |              |       |       |
|--|----------------------------|----------|-----------------------|-------------|-------|-------|-------|------------|-------|-------|--------------|-------|-------|
|  |                            |          | 30                    | 0.10        | 0.00  | 0.01  | 0.67  |            | 30    | 0.30  | 0.09         | 0.32  | 0.68  |
|  |                            |          | 50                    | 0.10        | 0.00  | 0.01  | 0.51  |            | 50    | 0.26  | 0.04         | 0.32  | 0.85  |
|  | <b><math>\eta_c</math></b> | <b>5</b> | 2                     | 4.27        | 5.56  | 20.41 | 0.78  | <b>2.5</b> | 2     | 1.96  | 3.42         | 23.05 | 0.83  |
|  |                            |          | 3                     | 4.39        | 1.83  | 12.84 | 0.72  |            | 3     | 3.20  | 4.38         | 23.18 | 0.82  |
|  |                            |          | 5                     | 4.95        | 0.87  | 1.59  | 0.75  |            | 5     | 2.96  | 3.11         | 25.72 | 0.76  |
|  |                            |          | 10                    | 4.98        | 0.30  | 0.46  | 0.77  |            | 10    | 1.86  | 1.71         | 21.79 | 0.56  |
|  |                            |          | 20                    | 4.98        | 0.16  | 0.23  | 0.87  |            | 20    | 2.32  | 1.38         | 19.56 | 0.67  |
|  |                            |          | 30                    | 4.99        | 0.13  | 0.20  | 0.76  |            | 30    | 2.02  | 0.79         | 18.14 | 0.62  |
|  |                            |          | 50                    | 4.99        | 0.10  | 0.17  | 0.75  |            | 50    | 2.46  | 0.48         | 2.69  | 0.82  |
|  |                            |          | <b><math>T</math></b> | <b>0.25</b> | 2     | 0.246 | 0.051 |            | 0.066 | 0.73  | <b>0.025</b> | 2     | 0.062 |
|  | 3                          | 0.255    |                       |             | 0.023 | 0.042 | 0.78  | 3          | 0.040 | 0.027 |              | 0.213 | 0.70  |
|  | 5                          | 0.250    |                       |             | 0.010 | 0.017 | 0.76  | 5          | 0.025 | 0.019 |              | 0.214 | 0.72  |
|  | 10                         | 0.250    |                       |             | 0.005 | 0.007 | 0.86  | 10         | 0.026 | 0.015 |              | 0.208 | 0.76  |
|  | 20                         | 0.249    |                       |             | 0.004 | 0.005 | 0.83  | 20         | 0.026 | 0.012 |              | 0.215 | 0.72  |
|  | 30                         | 0.250    |                       |             | 0.003 | 0.004 | 0.86  | 30         | 0.029 | 0.009 |              | 0.225 | 0.73  |
|  | 50                         | 0.251    |                       |             | 0.003 | 0.004 | 0.75  | 50         | 0.026 | 0.004 |              | 0.405 | 0.86  |

**Table S2.** Statistics associated with two-population datasets. Median estimates, median uncertainties, RMSE, and the proportional coverage of 95% confidence intervals for all model parameters models, and sample sizes are given.

| Model | Parameter | Simulated Value | $n$ | Median Estimate | Median Uncertainty | RMSE  | Coverage of 95% CI | Simulated Value | $n$ | Median Estimate | Median Uncertainty | RMSE  | Coverage of 95% CI |
|-------|-----------|-----------------|-----|-----------------|--------------------|-------|--------------------|-----------------|-----|-----------------|--------------------|-------|--------------------|
| SNM   | $\theta$  | 10000           | 1   | 10017.97        | 74.59              | 75.24 | 0.96               | NA              | --  | --              | --                 | --    | --                 |
|       |           |                 | 2   | 10007.93        | 62.62              | 71.94 | 0.95               |                 | --  | --              | --                 | --    | --                 |
|       |           |                 | 3   | 9996.10         | 57.93              | 57.29 | 0.96               |                 | --  | --              | --                 | --    | --                 |
|       |           |                 | 5   | 10005.86        | 53.39              | 47.90 | 0.97               |                 | --  | --              | --                 | --    | --                 |
|       |           |                 | 10  | 10005.07        | 48.64              | 49.07 | 0.94               |                 | --  | --              | --                 | --    | --                 |
|       |           |                 | 20  | 10005.58        | 45.01              | 41.01 | 0.96               |                 | --  | --              | --                 | --    | --                 |
|       |           |                 | 30  | 9989.46         | 43.21              | 45.61 | 0.93               |                 | --  | --              | --                 | --    | --                 |
| ISO   | $\theta$  | 7250            | 1   | 7250.41         | 99.19              | 96.42 | 0.96               | 7250            | 1   | 7235.79         | 94.11              | 84.08 | 0.97               |
|       |           |                 | 2   | 7263.58         | 72.71              | 80.20 | 0.94               |                 | 2   | 7238.79         | 68.72              | 60.55 | 0.98               |
|       |           |                 | 3   | 7241.85         | 65.64              | 66.38 | 0.94               |                 | 3   | 7256.19         | 61.28              | 61.59 | 0.98               |
|       |           |                 | 5   | 7246.54         | 59.92              | 55.61 | 0.96               |                 | 5   | 7253.37         | 54.76              | 56.03 | 0.94               |
|       |           |                 | 10  | 7245.33         | 55.14              | 55.39 | 0.97               |                 | 10  | 7256.28         | 49.13              | 52.79 | 0.96               |
|       |           |                 | 20  | 7245.45         | 52.22              | 54.32 | 0.95               |                 | 20  | 7241.88         | 44.95              | 44.70 | 0.97               |
|       |           |                 | 30  | 7260.21         | 51.09              | 53.79 | 0.94               |                 | 30  | 7246.88         | 43.05              | 42.86 | 0.94               |
|       | $s$       | 0.5             | 1   | 0.47            | 0.18               | 0.22  | 0.67               | 0.5             | 1   | 0.36            | 0.47               | 0.23  | 0.81               |
|       |           |                 | 2   | 0.51            | 0.07               | 0.07  | 0.91               |                 | 2   | 0.25            | 0.20               | 0.24  | 0.58               |
|       |           |                 | 3   | 0.50            | 0.04               | 0.05  | 0.87               |                 | 3   | 0.25            | 0.19               | 0.24  | 0.67               |
|       |           |                 | 5   | 0.50            | 0.03               | 0.02  | 0.97               |                 | 5   | 0.23            | 0.11               | 0.25  | 0.41               |
|       |           |                 | 10  | 0.50            | 0.02               | 0.02  | 0.94               |                 | 10  | 0.27            | 0.11               | 0.23  | 0.52               |
|       |           |                 | 20  | 0.50            | 0.01               | 0.01  | 0.93               |                 | 20  | 0.38            | 0.07               | 0.16  | 0.55               |
|       |           |                 | 30  | 0.50            | 0.01               | 0.01  | 0.92               |                 | 30  | 0.45            | 0.04               | 0.07  | 0.81               |
|       | $\eta_1$  | 1               | 1   | 1.06            | 0.68               | 3.16  | 0.82               | 1               | 1   | 2.46            | 5.85               | 4.01  | 0.99               |
|       |           |                 | 2   | 0.98            | 0.16               | 0.17  | 0.92               |                 | 2   | 2.76            | 4.40               | 3.13  | 0.97               |
|       |           |                 | 3   | 1.00            | 0.10               | 0.10  | 0.92               |                 | 3   | 2.66            | 3.26               | 3.02  | 0.96               |
|       |           |                 | 5   | 1.00            | 0.06               | 0.05  | 0.98               |                 | 5   | 2.67            | 2.28               | 3.13  | 0.96               |
|       |           |                 | 10  | 1.01            | 0.03               | 0.04  | 0.96               |                 | 10  | 2.03            | 0.94               | 1.63  | 0.90               |
|       |           |                 | 20  | 1.00            | 0.02               | 0.02  | 0.94               |                 | 20  | 1.31            | 0.23               | 0.70  | 0.78               |
|       |           |                 | 30  | 1.00            | 0.02               | 0.02  | 0.96               |                 | 30  | 1.07            | 0.10               | 0.14  | 0.89               |

|           |          |             |    |         |        |        |      |              |    |         |        |        |      |
|-----------|----------|-------------|----|---------|--------|--------|------|--------------|----|---------|--------|--------|------|
|           | $\eta_2$ | <b>1</b>    | 1  | 0.95    | 0.53   | 1.39   | 0.76 | <b>1</b>     | 1  | 0.89    | 1.74   | 1.98   | 0.97 |
|           |          |             | 2  | 1.01    | 0.16   | 0.16   | 0.92 |              | 2  | 0.68    | 0.41   | 0.39   | 0.93 |
|           |          |             | 3  | 1.01    | 0.10   | 0.12   | 0.87 |              | 3  | 0.69    | 0.26   | 0.34   | 0.79 |
|           |          |             | 5  | 0.99    | 0.06   | 0.05   | 1.00 |              | 5  | 0.71    | 0.14   | 0.32   | 0.55 |
|           |          |             | 10 | 1.00    | 0.03   | 0.04   | 0.95 |              | 10 | 0.72    | 0.12   | 0.29   | 0.46 |
|           |          |             | 20 | 1.00    | 0.02   | 0.02   | 0.95 |              | 20 | 0.84    | 0.09   | 0.21   | 0.56 |
|           |          |             | 30 | 1.00    | 0.02   | 0.02   | 0.98 |              | 30 | 0.94    | 0.07   | 0.10   | 0.78 |
|           | $T$      | <b>0.25</b> | 1  | 0.247   | 0.013  | 0.013  | 0.93 | <b>0.025</b> | 1  | 0.026   | 0.010  | 0.008  | 0.91 |
|           |          |             | 2  | 0.249   | 0.007  | 0.007  | 0.94 |              | 2  | 0.025   | 0.004  | 0.004  | 0.97 |
|           |          |             | 3  | 0.250   | 0.005  | 0.005  | 0.96 |              | 3  | 0.024   | 0.003  | 0.003  | 0.96 |
|           |          |             | 5  | 0.250   | 0.004  | 0.003  | 0.97 |              | 5  | 0.025   | 0.002  | 0.002  | 0.94 |
|           |          |             | 10 | 0.250   | 0.003  | 0.003  | 0.97 |              | 10 | 0.025   | 0.001  | 0.001  | 0.95 |
|           |          |             | 20 | 0.250   | 0.002  | 0.002  | 0.95 |              | 20 | 0.025   | 0.001  | 0.001  | 0.88 |
|           |          |             | 30 | 0.249   | 0.002  | 0.002  | 0.96 |              | 30 | 0.025   | 0.000  | 0.000  | 0.94 |
| <b>IM</b> | $\theta$ | <b>7250</b> | 1  | 7246.28 | 203.39 | 305.88 | 0.96 | <b>7250</b>  | 1  | 7221.27 | 160.54 | 144.97 | 0.93 |
|           |          |             | 2  | 7264.36 | 88.28  | 88.09  | 0.97 |              | 2  | 7238.68 | 98.11  | 79.05  | 0.98 |
|           |          |             | 3  | 7265.99 | 74.06  | 77.11  | 0.93 |              | 3  | 7250.48 | 74.04  | 78.58  | 0.97 |
|           |          |             | 5  | 7244.66 | 64.38  | 60.66  | 0.96 |              | 5  | 7244.09 | 58.55  | 62.06  | 0.97 |
|           |          |             | 10 | 7239.43 | 57.56  | 54.82  | 0.96 |              | 10 | 7244.47 | 50.20  | 60.79  | 0.95 |
|           |          |             | 20 | 7254.67 | 53.80  | 58.82  | 0.91 |              | 20 | 7252.22 | 45.14  | 47.09  | 0.95 |
|           |          |             | 30 | 7251.44 | 52.29  | 56.89  | 0.93 |              | 30 | 7266.62 | 43.41  | 41.67  | 0.96 |
|           | $s$      | <b>0.5</b>  | 1  | 0.36    | 0.31   | 0.26   | 0.67 | <b>0.5</b>   | 1  | 0.47    | 0.46   | 0.27   | 0.71 |
|           |          |             | 2  | 0.51    | 0.12   | 0.14   | 0.84 |              | 2  | 0.50    | 0.35   | 0.25   | 0.78 |
|           |          |             | 3  | 0.51    | 0.07   | 0.07   | 0.92 |              | 3  | 0.51    | 0.25   | 0.26   | 0.67 |
|           |          |             | 5  | 0.50    | 0.04   | 0.04   | 0.95 |              | 5  | 0.56    | 0.18   | 0.23   | 0.64 |
|           |          |             | 10 | 0.50    | 0.02   | 0.02   | 0.93 |              | 10 | 0.52    | 0.15   | 0.17   | 0.77 |
|           |          |             | 20 | 0.50    | 0.02   | 0.02   | 0.94 |              | 20 | 0.53    | 0.08   | 0.10   | 0.88 |
|           | $\eta_1$ | <b>1</b>    | 1  | 1.01    | 0.90   | 1.85   | 0.88 | <b>1</b>     | 1  | 1.27    | 1.61   | 2.73   | 1.00 |
|           |          |             | 2  | 1.00    | 0.20   | 0.27   | 0.90 |              | 2  | 1.06    | 1.52   | 2.51   | 0.97 |
|           |          |             | 3  | 0.98    | 0.10   | 0.12   | 0.92 |              | 3  | 1.09    | 0.91   | 2.74   | 0.83 |
|           |          |             | 5  | 1.01    | 0.06   | 0.06   | 0.98 |              | 5  | 0.97    | 0.47   | 2.55   | 0.82 |
|           |          |             | 10 | 1.01    | 0.03   | 0.04   | 0.93 |              | 10 | 1.01    | 0.33   | 1.62   | 0.85 |



**Table S3.** Statistics associated with additional simulations of single-population models with more ancient events ( $T = 1.5$ ). Simulated parameter values, median estimates, and RMSE are given for all parameters of the four single-population models. Datasets consisted of  $n = 30$  diploid individuals. Model parameters are slightly modified from the A parameterization in Table 1.

| <b>Model</b> | <b>Parameter</b> | <b>Simulated Value</b> | <b>Median Estimate</b> | <b>RMSE</b> |
|--------------|------------------|------------------------|------------------------|-------------|
| SNM          | $\theta$         | 10,700                 | 10,690.1               | 34.9        |
|              | $\theta$         | 4500                   | 4480.7                 | 28.7        |
| POSG         | $\eta_G$         | 5                      | 5.017                  | 0.0123      |
|              | $T$              | 1.5                    | 1.506                  | 0.0711      |
| NEGG         | $\theta$         | 91,500                 | 106,108.7              | 73,649.4    |
|              | $\eta_D$         | 0.1                    | 0.086                  | 0.3092      |
|              | $T$              | 1.5                    | 1.322                  | 0.6167      |
| BG           | $\theta$         | 6700                   | 9720.6                 | 2602.6      |
|              | $\eta_D$         | 0.1                    | 0.052                  | 0.0989      |
|              | $\eta_G$         | 5                      | 3.375                  | 1.2565      |
|              | $T$              | 1.5                    | 1.100                  | 1.0873      |

**Table S4.** Statistics associated with additional simulations of single-population models with much larger sample size ( $n = 1351$  individuals, as for European samples analyzed by Tennesen et al. 2012). Simulated parameter values, median estimates, and RMSE are given for all parameters of the four single-population models. Datasets consisted of  $n = 1351$  diploid individuals. Model parameters are slightly modified from the A parameterization in Table 1.

| <b>Model</b> | <b>Parameter</b> | <b>Simulated Value</b> | <b>Median Estimate</b> | <b>RMSE</b> |
|--------------|------------------|------------------------|------------------------|-------------|
| SNM          | $\theta$         | 5900                   | 5897.9                 | 43.6        |
|              | $\theta$         | 2300                   | 2295.2                 | 11.3        |
| POSG         | $\eta_G$         | 5                      | 5.006                  | 0.0586      |
|              | $T$              | 0.25                   | 0.250                  | 0.0037      |
| NEGG         | $\theta$         | 23,600                 | 23,592.4               | 268.8       |
|              | $\eta_D$         | 0.1                    | 0.100                  | 0.0022      |
|              | $T$              | 0.25                   | 0.250                  | 0.0033      |
| BG           | $\theta$         | 3000                   | 3021.7                 | 77.8        |
|              | $\eta_D$         | 0.1                    | 0.099                  | 0.0071      |
|              | $\eta_G$         | 5                      | 4.964                  | 0.0020      |
|              | $T$              | 0.25                   | 0.250                  | 0.0020      |

**Table S5.** Statistics associated with additional simulations of two-population models with much more recent divergence ( $T = 0.005, 0.01N_A$  generations). Simulated parameter values, median estimates, and RMSE are given for all parameters of the four single-population models. Datasets consisted of  $n = 30$  diploid individuals per population. Model parameters are slightly modified from the A parameterization in Table 2.

| <b>Model</b> | <b>Parameter</b> | <b>Simulated Value</b> | <b>Median Estimate</b> | <b>RMSE</b> |
|--------------|------------------|------------------------|------------------------|-------------|
| SNM          | $\theta$         | 9300                   | 9295.6                 | 15.8        |
|              | $\theta$         | 9200                   | 9211.0                 | 43.3        |
| ISO          | $s$              | 0.5                    | 0.500                  | 0.1829      |
|              | $\eta_1$         | 1                      | 1.018                  | 0.1248      |
|              | $\eta_2$         | 1                      | 0.991                  | 0.1754      |
|              | $T$              | 0.005                  | 0.00487                | 0.00009     |
|              | $\theta$         | 9200                   | 9210.6                 | 28.1        |
| IM           | $s$              | 0.5                    | 0.434                  | 0.1689      |
|              | $\eta_1$         | 1                      | 1.112                  | 0.1502      |
|              | $\eta_2$         | 1                      | 0.891                  | 0.0855      |
|              | $T$              | 0.005                  | 0.00493                | 0.00009     |
|              | $m_{12}$         | 1                      | 0.766                  | 4.6695      |
|              | $m_{21}$         | 1                      | 0.692                  | 0.7105      |



**Table S6.** Average numbers of single nucleotide polymorphism (SNP) loci in simulated datasets. Simulated theta values were set to give ~50,000 SNP loci in the largest datasets for “easy” parameterizations (e.g. IMa, POSGa, NEGGa, BGa), and this parameter value was used for all simulations of that model (“easy” and “hard” parameterizations, all sample sizes).

| <b>1 population models</b> |            |              |              |              |              |            |            |
|----------------------------|------------|--------------|--------------|--------------|--------------|------------|------------|
| <b>Sample Size</b>         | <b>SNM</b> | <b>POSGa</b> | <b>POSGb</b> | <b>NEGGa</b> | <b>NEGGb</b> | <b>BGa</b> | <b>BGb</b> |
| 4                          | 18,109.9   | 12,292.7     | 10,979.3     | 26,524.6     | 50,817.1     | 13,721.4   | 17,928.0   |
| 6                          | 22,560.4   | 15,641.5     | 13,717.0     | 31,994.3     | 62,955.9     | 17,268.2   | 22,322.6   |
| 10                         | 28,072.1   | 20,189.7     | 17,122.5     | 37,420.6     | 77,298.8     | 21,887.1   | 27,620.2   |
| 20                         | 35,289.9   | 27,299.0     | 21,732.4     | 42,915.8     | 94,903.5     | 29,140.3   | 34,565.6   |
| 40                         | 42,457.2   | 35,924.6     | 26,565.9     | 46,916.8     | 110,257.0    | 38,453.4   | 41,238.3   |
| 60                         | 46,607.0   | 41,939.8     | 29,545.4     | 48,811.7     | 117,904.4    | 45,246.6   | 45,237.8   |
| 100                        | 51,764.6   | 50,428.0     | 33,448.0     | 50,863.3     | 126,336.0    | 55,472.2   | 50,307.6   |

  

| <b>2 population models</b>        |            |             |             |            |            |
|-----------------------------------|------------|-------------|-------------|------------|------------|
| <b>Sample Size<br/>(per pop.)</b> | <b>SNM</b> | <b>ISOa</b> | <b>ISOb</b> | <b>IMa</b> | <b>IMb</b> |
| 2                                 | 18,033.5   | 14,867.9    | 13,274.7    | 14,651.0   | 13,252.8   |
| 4                                 | 25,544.8   | 20,980.8    | 18,796.2    | 20,790.8   | 18,789.8   |
| 6                                 | 29,769.8   | 24,678.1    | 21,991.9    | 24,525.3   | 21,966.8   |
| 10                                | 35,131.4   | 29,626.4    | 26,061.5    | 29,534.4   | 25,984.3   |
| 20                                | 42,305.5   | 36,994.3    | 31,715.6    | 36,885.0   | 31,623.2   |
| 40                                | 49,407.3   | 45,010.5    | 37,703.7    | 44,961.6   | 37,524.6   |
| 60                                | 53,466.5   | 49,979.4    | 41,425.8    | 49,889.6   | 41,250.3   |
